# Supplementary material for: Self-Powered Electrical Impulse Chemotherapy for Oral Squamous Cell Carcinoma
Source: MDPI journal article supplement (doi:10.3390/ma15062060), 2022-03-10
Supplement: s1 [file s1]

## Supplementary Materials

# Self-Powered Electrical Impulse Chemotherapy for Oral Squamous Cell Carcinoma

Chaochao Zhao <sup>1,2</sup>, Yuan Yang <sup>2,3</sup>, Xi Cui <sup>2,3</sup>, Yizhu Shan <sup>2,3</sup>, Jiangtao Xue <sup>2,4</sup>, Dongjie Jiang <sup>2,3</sup>, Jinyan Sun <sup>1</sup>, Na Li <sup>1</sup>, Zhou Li <sup>2,3</sup> and Anping Yang <sup>1,\*</sup>

<sup>1</sup> Department of Biomedical Engineering, School of Medicine, Foshan University, Foshan 528225, China; zhaochaochao@fosu.edu.cn (C.Z.); jinyansun@fosu.edu.cn (J.S.); lina1102@fosu.edu.cn (N.L.)

<sup>2</sup> Beijing Key Laboratory of Micro-Nano Energy and Sensor, Beijing Institute of Nanoenergy and Nanosystems, Chinese Academy of Sciences, Beijing 101400, China; yangyuan@binn.cas.cn (Y.Y.); cuixi@binn.cas.cn (X.C.); shanyizhu@binn.cas.cn (Y.S.); xuejiangtao@binn.cas.cn (J.X.); jiangdongjie@binn.cas.cn (D.J.); zli@binn.cas.cn (Z.L.)

<sup>3</sup> School of Nanoscience and Technology, University of Chinese Academy of Sciences, Beijing 101400, China

<sup>4</sup> School of Life Science, Beijing Institute of Technology, Beijing 100081, China

\* Correspondence: foshanyap@fosu.edu.cn

## Supplementary Figures S1–10.

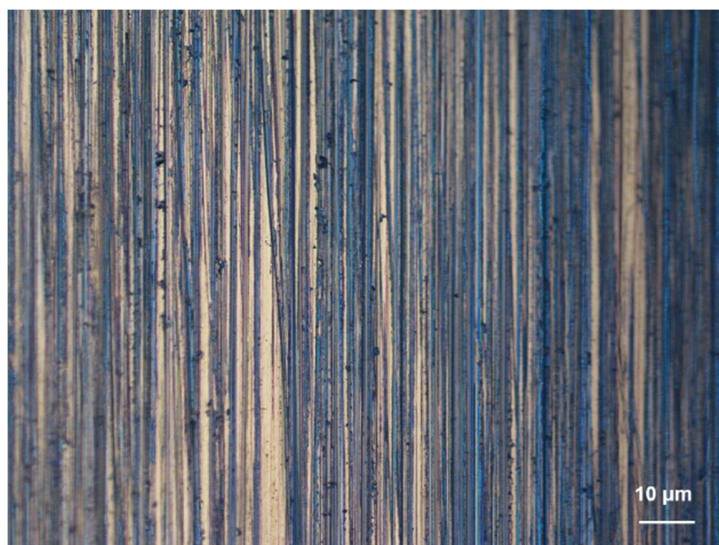

**Figure S1.** The surface microstructure of the Al sheet acquired by an optical microscope.

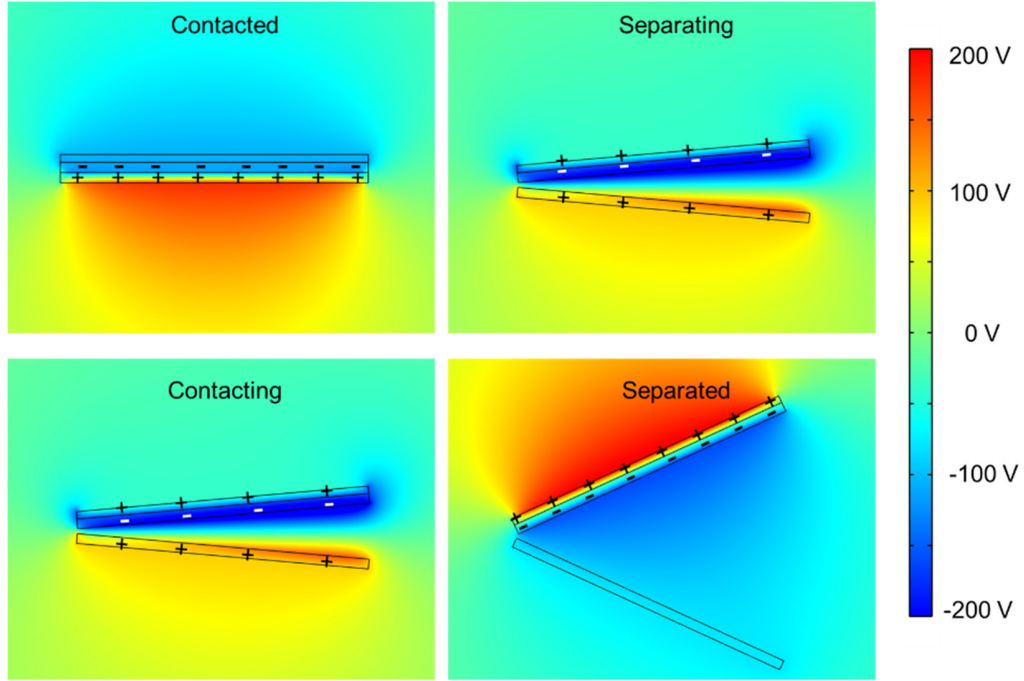

**Figure S2.** The TENG's electrical distribution of charges with COMSOL software.

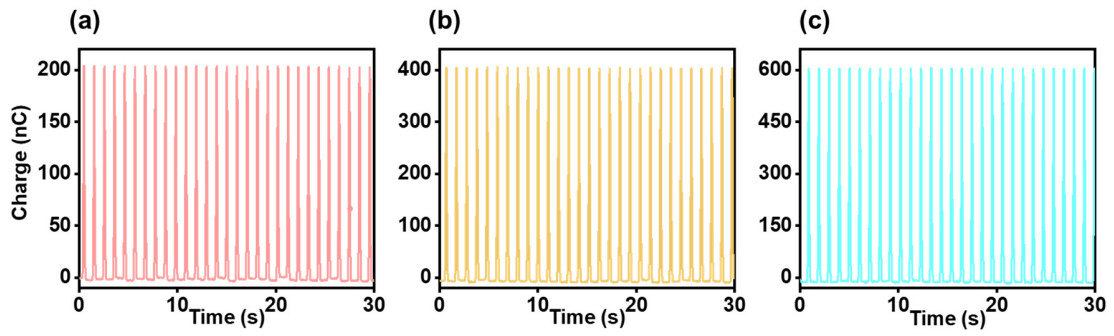

**Figure S3.** (a) The  $Q_{sc}$  when two PET layers working. (b) The  $Q_{sc}$  when three PET layers working. (c) The  $Q_{sc}$  when four PET layers working.

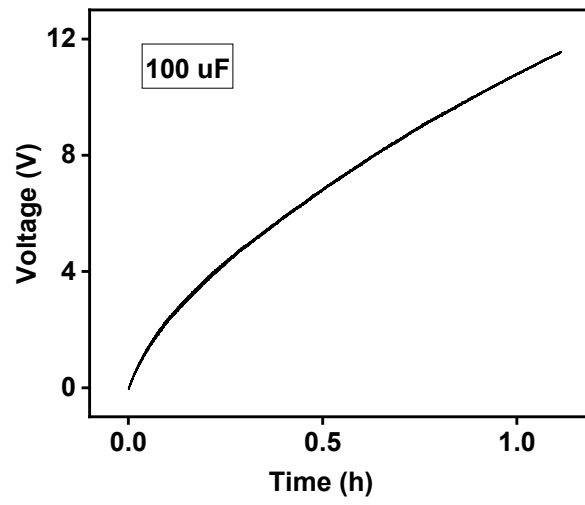

**Figure S4.** The charging curve of the TENG.

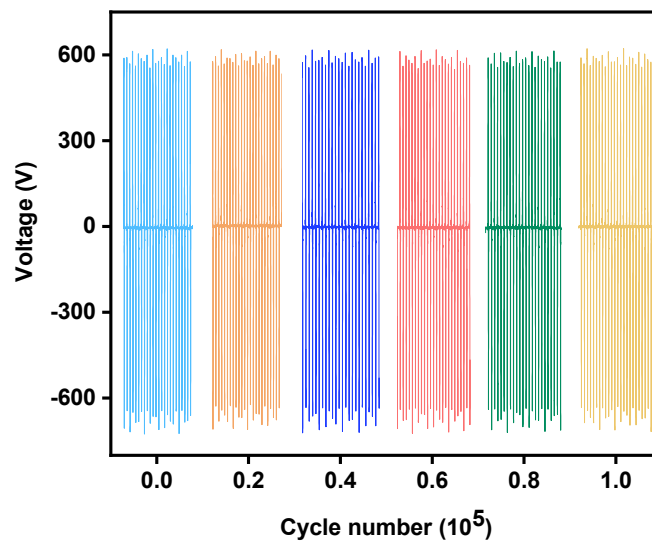

**Figure S5.** The stability test of the TENG.

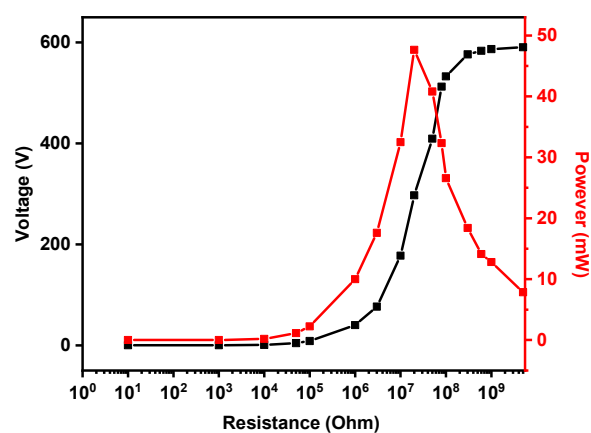

**Figure S6.** The power measurement of the TENG.

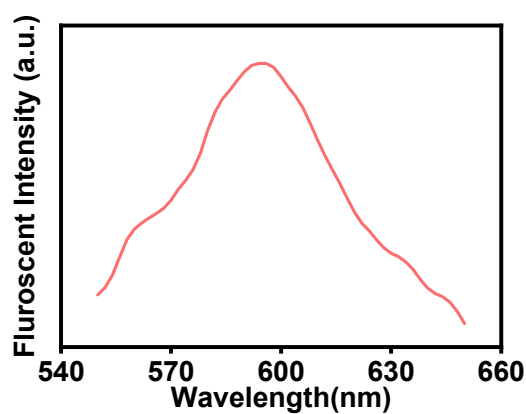

**Figure S7.** The fluorescence emission curve of the DOX.

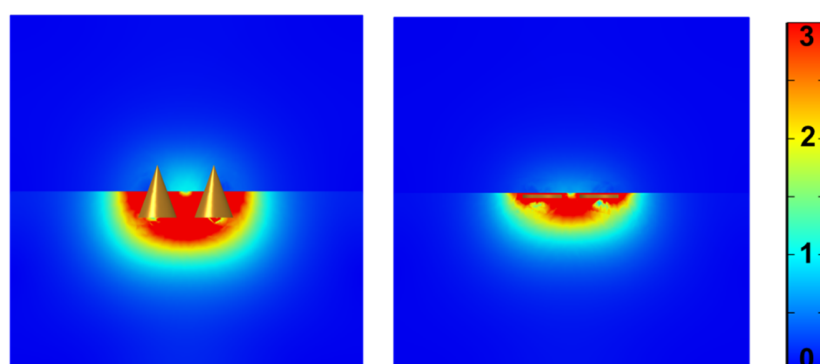

**Figure S8.** The finite element analysis of the microneedle electrode and planar electrode with the voltage of 200 V. EF: KV/cm.

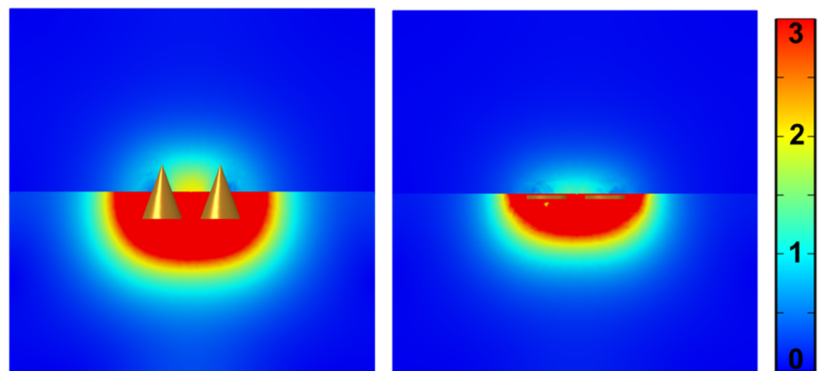

**Figure S9.** The finite element analysis of the microneedle electrode and planar electrode with the voltage of 400 V. EF: KV/cm.

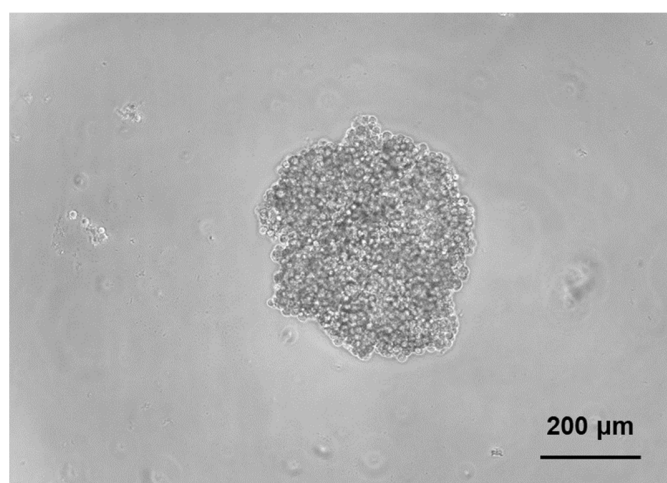

**Figure S10.** The optical microscope image of the MCTS on Day 0.
